# Supplementary material for: Cardiovascular Risk Factors Are Associated With Increased Arterial Stiffness in Youth With Type 1 Diabetes
Source: Oxford University Press journal article supplement (doi:10.2337/dc13-0851), 2013-10-08

SUPPLEMENTARY DATA

**Supplementary Figure 1.** Bland-Altman plot of Pulse Wave Velocity actual and quality control (QC) data on 54 participants.

Actual PWV: mean (SD) = 5.68 (1.04) m/sec; Duplicate PWV: mean (SD) = 5.73 (1.13) m/sec; Average difference: mean (SD) = -0.0435 (0.526),  $p = 0.5459$ .

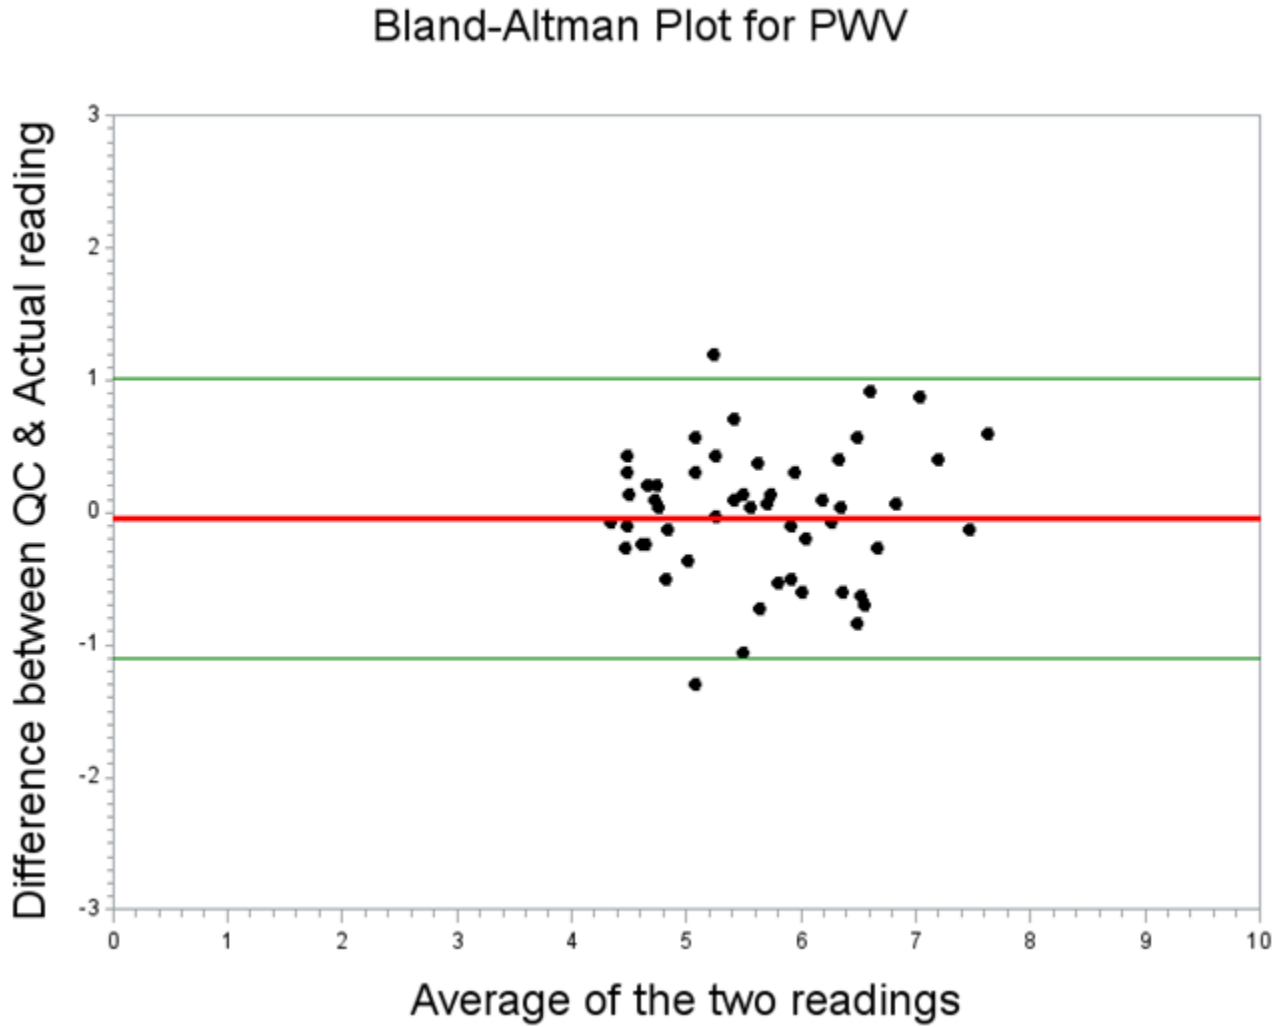

Supplement: dc130851supplementarydata.pdf [file dc130851supplementarydata.pdf]
